# Supplementary material
Source: PubMed Central journal article supplement (PMC3778089)

## Supplemental figure legends

**Figure S1.** Validation of knockdowns. A, Knockdowns of *KRAS*, *HDAC6*, and *SIRT2* in SW480 and DLD-1 cells were validated by western blotting. B, Knockdowns of *KRAS*, *SIRT1*, *SIRT2*, *HDAC1*, and *HDAC6* in NIH3t3 cells expressing K-RAS<sup>G12V</sup> or K-RAS<sup>G12V/K104A</sup>. GAPDH was used as a loading control for all western blots.

**Figure S2.** Regulation of K-RAS acetylation and oncogenicity by HDAC1/6. A, Co-immunoprecipitation of endogenous RAS and HDAC1 in CRC cells. RAS does not immunoprecipitate with HDAC1. B, Colony forming assay in CRC cells. Both *HDAC6* and *KRAS* knockdowns suppress colony formation.

**Figure S3.** SIRT2 regulates K-RAS acetylation and oncogenicity. A, Co-immunoprecipitation of endogenous RAS and SIRT2 in CRC cells. Although the levels of SIRT2 vary among cell lines, it can always be immunoprecipitated with RAS. B, Co-immunoprecipitation of ectopic K-RAS and SIRT2 in 293T cells. K-RAS interacts less efficiently with a catalytically dead version of SIRT2 (HY). C, Colony forming assay in CRC cells. Both *SIRT2* and *KRAS* knockdowns suppress colony formation. D, Knockdown of *KRAS* in lung cancer cell lines. Some lung cancer cell lines (e.g. H2009) are sensitive to loss of SIRT.

Supplemental Figure 1

A

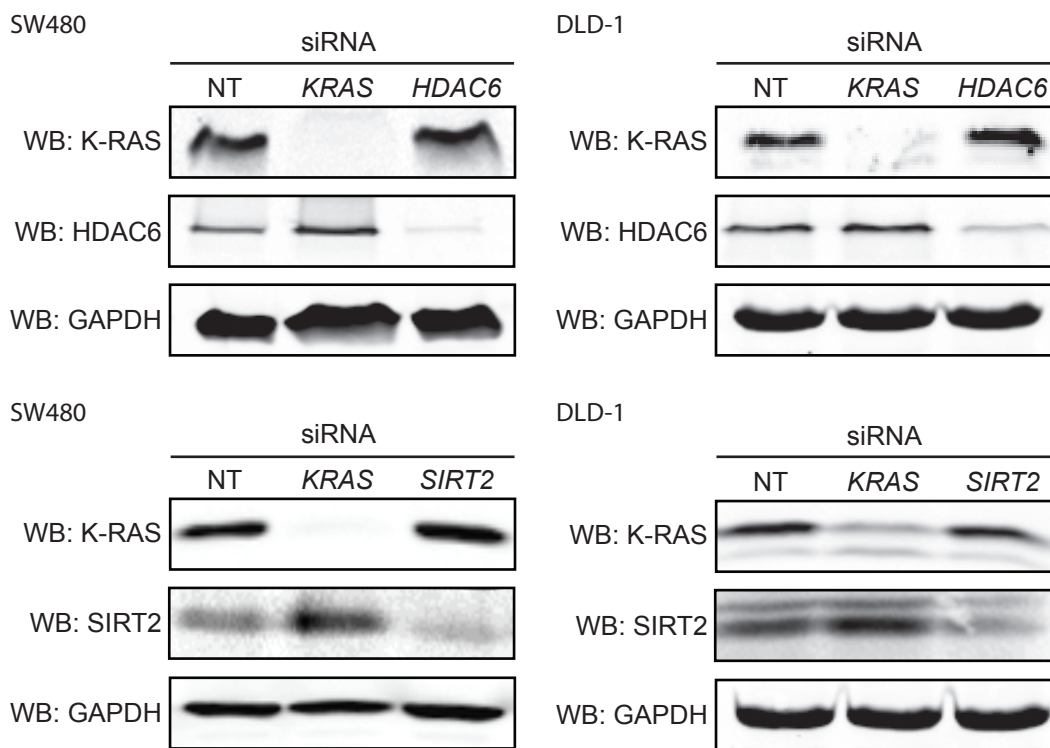

B

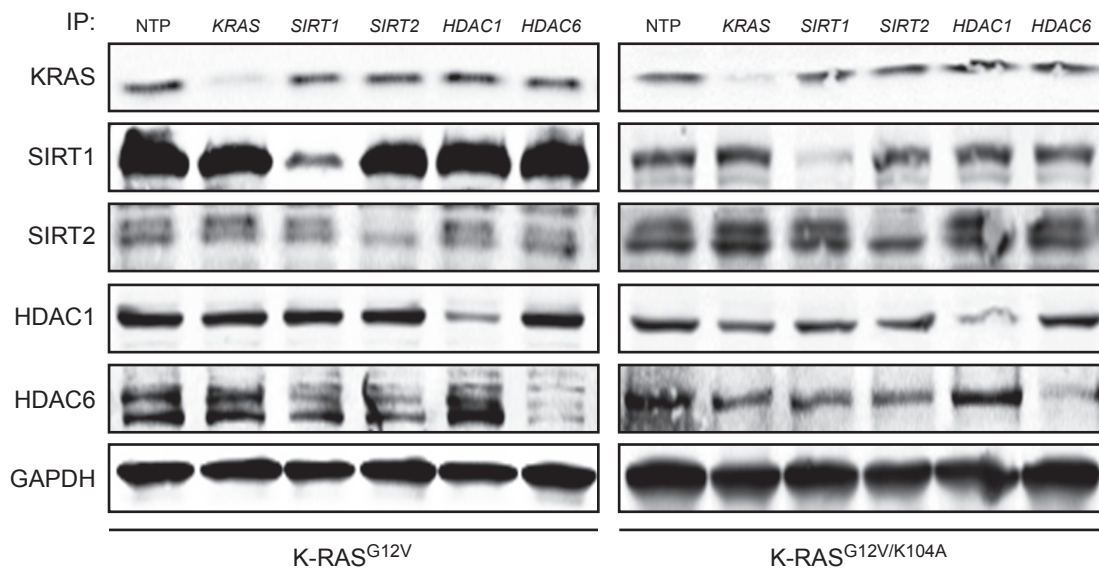

Supplemental Figure 2

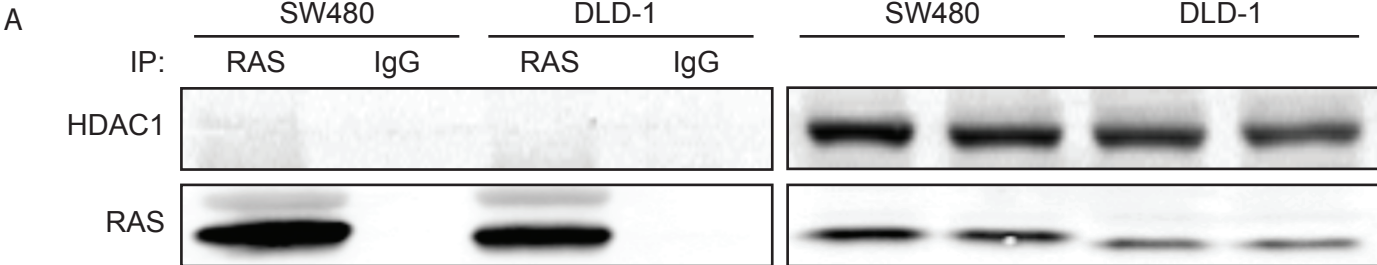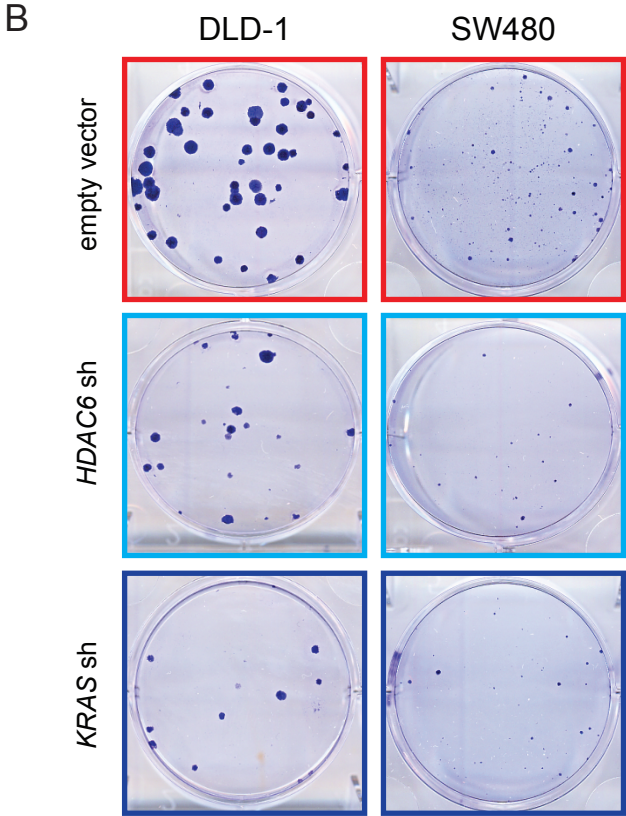

Supplemental Figure 3

A

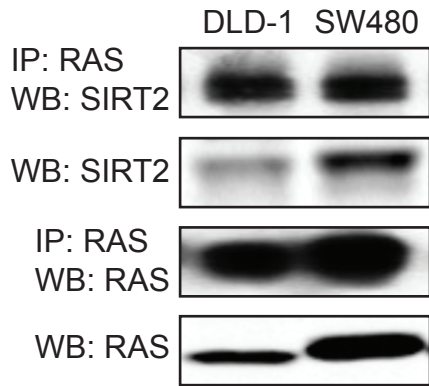

B

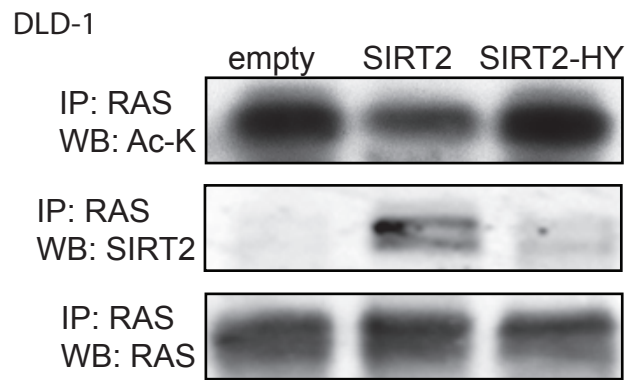

C

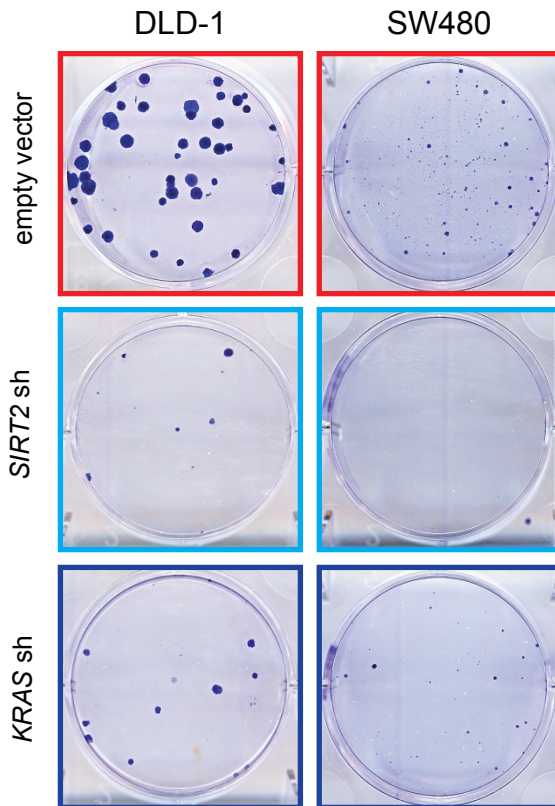

D

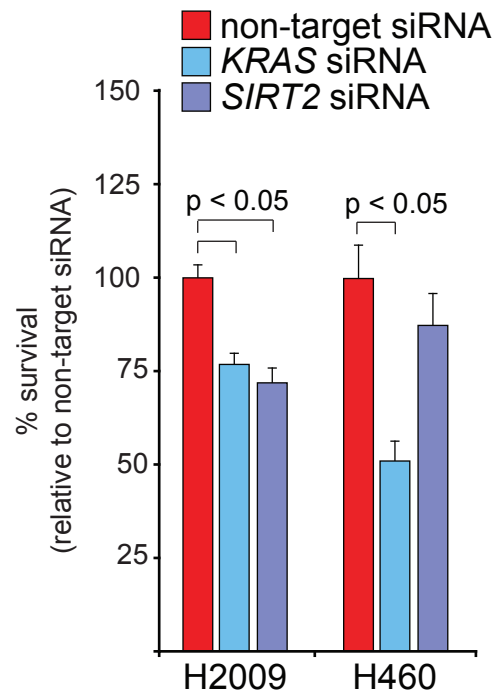

Supplement: NIHMS486812-supplement-1.pdf [file NIHMS486812-supplement-1.pdf]
